# Supplementary material for: Synthesis, structure and luminescent properties of lanthanide fluoroalkoxides
Source: Royal Society of Chemistry journal article supplement (doi:10.1039/c5dt04636j), 2016-01-01
Supplement: c5dt04636j1.pdf [file c5dt04636j1.pdf]

## Electronic Supporting Information

### X-ray Crystallography

The X-ray diffraction data for **1-3** and **9-11** were collected on a Bruker AXS SMART APEX (**1**, **2**, **9**, **10**) and Oxford Xcalibur Eos (**3**, **11**) diffractometers (Mo- $K_{\alpha}$  radiation,  $\omega$ -scan technique,  $\lambda = 0.71073 \text{ \AA}$ ). The intensity data were integrated by SAINT (**1-2**, **10**),<sup>1</sup> (**9**)<sup>2</sup> and CrysAlisPro (**3**, **11**)<sup>3</sup> programs. All structures were solved by direct methods and were refined on  $F_{hkl}$ <sup>2</sup> using SHELXTL package (**2**),<sup>4</sup> (**1**, **9-11**),<sup>5</sup> (**3**).<sup>6</sup> All non-hydrogen atoms were refined anisotropically. All hydrogen atoms were placed in calculated positions and refined in the riding model. SADABS (**1-2**, **10**),<sup>7</sup> (**9**)<sup>8</sup> and SCALE3 ABSPACK (**3** and **11**)<sup>9</sup> were used to perform absorption corrections. The crystal of **9** contains solvate molecules of toluene, which are disordered in a common position. The details of crystallographic, collection and refinement data for **1**, **2**, **3**, **9**, **10** and **11** are presented in Table S1 and corresponding cif files are available as supporting information. CCDC 1437391 (**1**), CCDC 1437390 (**2**), CCDC 1437392 (**3**), CCDC 1437393 (**9**), CCDC 1437394 (**10**) and CCDC 1437395 (**11**) contain the supplementary crystallographic data for this paper.

| Complex                                         | <b>1</b>                                                                        | <b>2</b>                                                                        | <b>3</b>                                                                                         | <b>9</b>                                                                           | <b>10</b>                                                                       | <b>11</b>                                                                         |
|-------------------------------------------------|---------------------------------------------------------------------------------|---------------------------------------------------------------------------------|--------------------------------------------------------------------------------------------------|------------------------------------------------------------------------------------|---------------------------------------------------------------------------------|-----------------------------------------------------------------------------------|
| Empirical formula                               | C <sub>26</sub> H <sub>26</sub> F <sub>36</sub> O <sub>10</sub> Sm <sub>2</sub> | C <sub>26</sub> H <sub>26</sub> F <sub>36</sub> O <sub>10</sub> Yb <sub>2</sub> | C <sub>42</sub> H <sub>22</sub> Ce <sub>2</sub> F <sub>36</sub><br>N <sub>4</sub> O <sub>6</sub> | C <sub>43</sub> H <sub>25</sub> CeF <sub>24</sub><br>N <sub>4</sub> O <sub>4</sub> | C <sub>66</sub> H <sub>64</sub> F <sub>84</sub> O <sub>20</sub> Sm <sub>6</sub> | C <sub>29</sub> H <sub>27</sub> Eu <sub>2</sub> F <sub>42</sub> O <sub>11</sub> Y |
| Formula weight                                  | 1483.17                                                                         | 1528.55                                                                         | 1642.87                                                                                          | 1257.79                                                                            | 3675.27                                                                         | 1742.33                                                                           |
| Temperature [K]                                 | 100(2)                                                                          | 100(2)                                                                          | 100(2)                                                                                           | 100(2)                                                                             | 100(2)                                                                          | 100(2)                                                                            |
| Crystal system                                  | Monoclinic                                                                      | Monoclinic                                                                      | Monoclinic                                                                                       | Monoclinic                                                                         | Triclinic                                                                       | Monoclinic                                                                        |
| Space group                                     | P2(1)/c                                                                         | P2(1)/c                                                                         | P2(1)/n                                                                                          | C2/c                                                                               | P1                                                                              | P2(1)/n                                                                           |
| Unit cell dimensions                            |                                                                                 |                                                                                 |                                                                                                  |                                                                                    |                                                                                 |                                                                                   |
| a[Å]                                            | 9.5630(19)                                                                      | 9.7029(6)                                                                       | 9.54922(17)                                                                                      | 20.3363(9)                                                                         | 10.7448(4)                                                                      | 13.17185(19)                                                                      |
| b[Å]                                            | 17.979(4)                                                                       | 18.0209(10)                                                                     | 20.5060(3)                                                                                       | 13.8976(6)                                                                         | 13.4413(5)                                                                      | 16.6717(2)                                                                        |
| c[Å]                                            | 13.370(3)                                                                       | 13.1321(7)                                                                      | 13.29116(17)                                                                                     | 32.5868(15)                                                                        | 19.2506(8)                                                                      | 23.4167(4)                                                                        |
| $\alpha$ [°]                                    | 90                                                                              | 90                                                                              | 90                                                                                               | 90                                                                                 | 90.2290(10)                                                                     | 90                                                                                |
| $\beta$ [°]                                     | 106.261(4)                                                                      | 107.6370(10)                                                                    | 100.8980(14)                                                                                     | 95.0310(10)                                                                        | 102.8870(10)                                                                    | 91.8369(14)                                                                       |
| $\gamma$ [°]                                    | 90                                                                              | 90                                                                              | 90                                                                                               | 90                                                                                 | 94.7970(10)                                                                     | 90                                                                                |
| Volume [Å <sup>3</sup> ]                        | 2206.8(8)                                                                       | 2188.3(2)                                                                       | 2555.69(7)                                                                                       | 9174.4(7)                                                                          | 2699.99(18)                                                                     | 5139.60(13)                                                                       |
| Z                                               | 2                                                                               | 2                                                                               | 2                                                                                                | 8                                                                                  | 1                                                                               | 4                                                                                 |
| Calculated density [Mg/m <sup>3</sup> ]         | 2.232                                                                           | 2.320                                                                           | 2.135                                                                                            | 1.821                                                                              | 2.260                                                                           | 2.252                                                                             |
| Absorption coefficient [mm <sup>-1</sup> ]      | 2.836                                                                           | 4.450                                                                           | 1.943                                                                                            | 1.138                                                                              | 3.414                                                                           | 3.733                                                                             |
| Crystal size [mm <sup>3</sup> ]                 | 0.33×0.20×<br>0.15                                                              | 0.30×0.25×<br>0.15                                                              | 0.20×0.10×<br>0.05                                                                               | 0.49×0.33×<br>0.32                                                                 | 0.21×0.16×<br>0.07                                                              | 0.15×0.15×<br>0.15                                                                |
| $\theta$ [°]                                    | 2.218 - 26.999                                                                  | 2.200 - 26.000                                                                  | 3.070 - 29.999                                                                                   | 1.770 - 24.998                                                                     | 1.848 - 25.999                                                                  | 3.000 - 26.000                                                                    |
| Reflections collected / unique                  | 17588 / 4755                                                                    | 18172 / 4287                                                                    | 53354 / 7440                                                                                     | 34787 / 8061                                                                       | 23376 / 20001                                                                   | 125864 / 10094                                                                    |
| R(int)                                          | 0.0585                                                                          | 0.0348                                                                          | 0.0544                                                                                           | 0.0318                                                                             | 0.0212                                                                          | 0.1210                                                                            |
| Final R indices [I>2 $\sigma$ (I)]              | R <sub>1</sub> =0.0479,<br>wR <sub>2</sub> =0.0920                              | R <sub>1</sub> =0.0419,<br>wR <sub>2</sub> =0.1062                              | R <sub>1</sub> =0.0320,<br>wR <sub>2</sub> =0.0660                                               | R <sub>1</sub> =0.0668,<br>wR <sub>2</sub> =0.1493                                 | R <sub>1</sub> =0.0603,<br>wR <sub>2</sub> =0.1527                              | R <sub>1</sub> =0.0393,<br>wR <sub>2</sub> =0.0909                                |
| R indices (all data)                            | R <sub>1</sub> =0.0672,<br>wR <sub>2</sub> =0.0965                              | R <sub>1</sub> =0.0561,<br>wR <sub>2</sub> =0.1127                              | R <sub>1</sub> =0.0434,<br>wR <sub>2</sub> =0.0694                                               | R <sub>1</sub> =0.0740,<br>wR <sub>2</sub> =0.1529                                 | R <sub>1</sub> =0.0820,<br>wR <sub>2</sub> =0.1647                              | R <sub>1</sub> =0.0485,<br>wR <sub>2</sub> =0.0953                                |
| S                                               | 1.031                                                                           | 1.055                                                                           | 1.052                                                                                            | 1.038                                                                              | 1.044                                                                           | 1.037                                                                             |
| Largest diff. peak and hole [e/Å <sup>3</sup> ] | 1.236/-1.379                                                                    | 2.046/-1.792                                                                    | 0.877/-0.957                                                                                     | 1.442/-0.914                                                                       | 1.920/-1.147                                                                    | 1.609/-1.349                                                                      |

Table S1. Details of crystallographic, collection and refinement data for **1-3**, **9-11**.

## References

1. SAINTPlus Data Reduction and Correction Program, v. 6.45a; Bruker AXS: Madison, WI, 2003.
2. SAINT. Data Reduction and Correction Program. v. 8.27B. Bruker AXS Inc., Madison, Wisconsin, USA, 2012.
3. Data Collection. Reduction and Correction Program. CrysAlisPro – Software Package Agilent Technologies, 2012.
4. G.M. Sheldrick, SHELXTL, v. 6.12 Structure Determination Software Suite; Bruker AXS: Madison, WI, 2000.
5. G.M. Sheldrick, SHELXTL, v. 6.14 Structure Determination Software Suite; Bruker AXS: Madison, WI, 2000.
6. G.M. Sheldrick, SHELXTL, v. 2013-4 Structure Determination Software Suite; Bruker AXS: Madison, WI, 2000.
7. Sheldrick G.M. SADABS-2012/1. Bruker/Siemens Area Detector Absorption Correction Program. Bruker AXS Inc., Madison, Wisconsin, USA, 2012.
8. SADABS. Bruker/Siemens Area Detector Absorption Correction Program, v.2014/2, Bruker AXS, Madison, Wisconsin, USA.
9. SCALE3 ABSPACK: Empirical absorption correction, CrysAlis Pro - Software Package, Agilent Technologies (2012).
